# Supplementary material for: Adhesion of Platelets to Colon Cancer Cells Is Necessary to Promote Tumor Development in Xenograft, Genetic and Inflammation Models
Source: MDPI journal article supplement (doi:10.3390/cancers13164243), 2021-08-23
Supplement: s1 [file s1]

## **S1. Supplementary figure legend**

**Supp. Fig. S1. Platelets/intestinal cells crosstalk in human intestine.** The protein expression of p-selectin and CD44 was investigated by immunofluorescence and confocal microscopy analysis in paraffin-embedded sections from normal portions of colon and colon adenocarcinoma. p-selectin in green and CD44 in red. Representative images are shown. Magnification 400X.

**Supp. Fig. S2. Gene expression analysis of Cyclin D1 and Pcn in HT-29 cells treated with P-sel<sup>+/+</sup> platelets and HT-29 cells treated with P-sel<sup>-/-</sup>platelets.** Cyclophilin was used as a housekeeping gene to normalize data. The results are expressed as mean  $\pm$  SEM. Statistical significance ( $P < 0.05$ ) was assessed by T student's test (N= 20 tumors per group).

**Supp. Fig. S3. Gene expression analysis of Il6 in APCMin/P-sel<sup>-/-</sup> and APCMin mice.** Cyclophilin was used as a housekeeping gene to normalize data. The results are expressed as mean  $\pm$  SEM. Statistical significance ( $P < 0.05$ ) was assessed by T student's test (N=10 mice per group).

**Supp. Fig. S4. P-selectin KO mice are protected from chronic colitis-associated colorectal carcinogenesis.** Gene expression analysis of Cyclin D1, Ccne1, Pten, Pcn and Il6 in P-sel<sup>-/-</sup> and P-sel<sup>+/+</sup> mice. Cyclophilin was used as a housekeeping gene to normalize data. The results are expressed as mean  $\pm$  SEM (N=10 mice per group).
